# Supplementary material
Source: PubMed Central journal article supplement (PMC4394872)
Supplement: Supp_Figure1.pdf [file Supp_Figure1.pdf]

## Supplementary Data

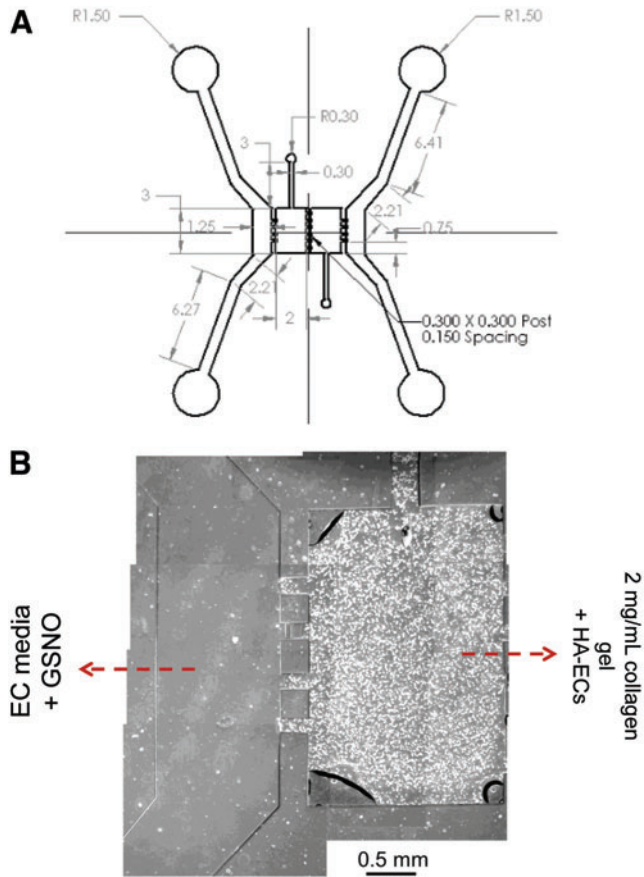

**SUPPLEMENTARY FIG. S1.** (A) Dimensions of the microfluidic device developed and implemented in this study. All dimensions are in mm. (B) Representative phase contrast image of a microfluidic device, showing intact collagen gel within the designated chambers of the device, after a 21 day culture. As shown, ECs and SMCs were cultured, in the presence of exogenous GSNO supplemented through the respective media channels. ECs, endothelial cells; GSNO, S-Nitrosoglutathione; SMCs, smooth muscle cells.
