# Supplementary material
Source: PubMed Central journal article supplement (PMC4394872)
Supplement: Supp_Figure2.pdf [file Supp_Figure2.pdf]

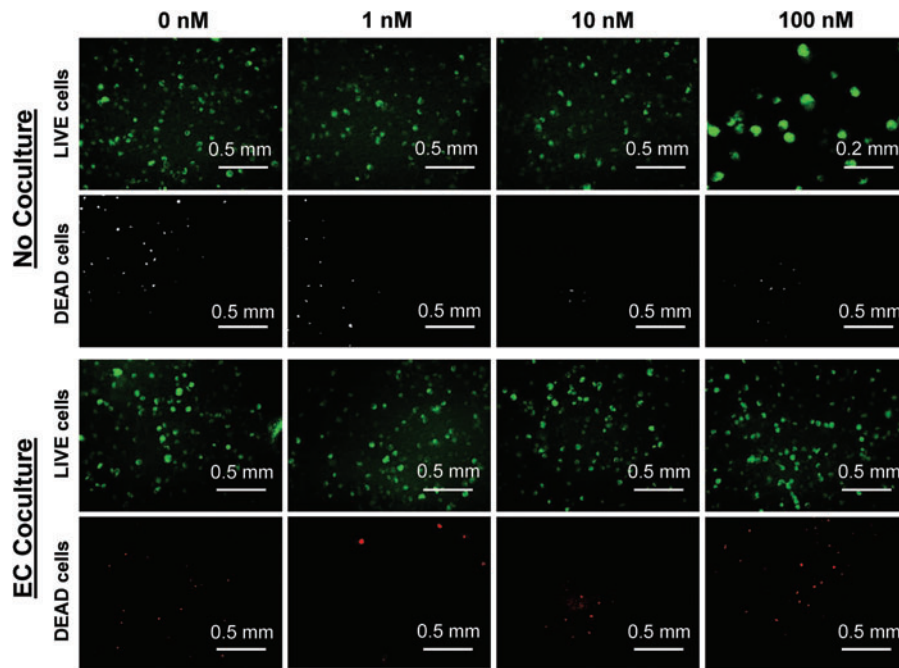

**SUPPLEMENTARY FIG. S2.** Representative images from Live/Dead<sup>®</sup> Assay performed on HA-SMCs at the end of 21 cultures. SMCs were cultured within microfluidic devices, in the presence or absence of EC cocultures, and GSNO (0–100 nM). The cells in *green* channel represent live cells, and those in the *red* channel represent the dead cells. It could be seen that cell death within cultures receiving GSNO or EC cocultures was not higher than that noted within controls, and the overall cell death was very minimal in all the cases. HA-SMCs, human aortic SMCs.
